1 **DNA Thermo-Protection Facilitates Whole Genome Sequencing of Mycobacteria Direct**  
2 **from Clinical Samples by the Nanopore Platform**

3 Sophie George<sup>a,b</sup>, Yifei Xu<sup>a,b</sup>, Gillian Rodger<sup>a,b</sup>, Marcus Morgan<sup>c</sup>, Nicholas D. Sanderson<sup>a,b</sup>,  
4 Sarah J. Hoosdally<sup>a,b</sup>, Samantha Thulborn<sup>d</sup>, Esther Robinson<sup>e</sup>, Priti Rathod<sup>e</sup>, A. Sarah  
5 Walker<sup>a,b</sup>, Timothy E. A. Peto<sup>a,b</sup>, Derrick W. Crook<sup>a,b</sup>, #Kate E. Dingle<sup>a,b</sup>

6

7 <sup>a</sup>Nuffield Department of Clinical Medicine, John Radcliffe Hospital, Oxford University, UK

8 <sup>b</sup>National Institute for Health Research (NIHR) Oxford Biomedical Research Centre, John  
9 Radcliffe Hospital, Oxford, UK

10 <sup>c</sup>Microbiology Department, Oxford University Hospitals NHS Trust, Oxford, UK.

11 <sup>d</sup>Respiratory Medicine Unit, Nuffield Department of Medicine, John Radcliffe Hospital,  
12 University of Oxford, UK

13 <sup>e</sup>PHE National Mycobacteria Reference Service - North and Central, Birmingham Public  
14 Health Laboratory, UK

15

16 Running Head: Direct-from-sample MTB whole genome sequencing

17

18 # Address correspondence to [kate.dingle@ndm.ox.ac.uk](mailto:kate.dingle@ndm.ox.ac.uk)

19 Sophie George and Yifei Xu contributed equally to this work. Author order was decided on  
20 the basis of amount of time spent performing wet-lab experiments versus time spent  
21 developing bioinformatics analysis.

22 **ABSTRACT**

23 *Mycobacterium tuberculosis* (MTB) is the leading cause of death from bacterial infection.  
24 Improved rapid diagnosis and antimicrobial resistance determination, such as by whole  
25 genome sequencing, are required. Our aim was to develop a simple, low-cost method of  
26 preparing DNA for Oxford Nanopore Technologies (ONT) sequencing direct from MTB  
27 positive clinical samples (without culture). Simultaneous sputum liquefaction, bacteria heat-  
28 inactivation (99°C/30min) and enrichment for Mycobacteria DNA was achieved using an  
29 equal volume of thermo-protection buffer (4M KCl, 0.05M HEPES buffer pH7.5, 0.1%  
30 DTT). The buffer emulated intracellular conditions found in hyperthermophiles, thus  
31 protecting DNA from rapid thermo-degradation, which renders it a poor template for  
32 sequencing. Initial validation employed Mycobacteria DNA (extracted or intracellular). Next,  
33 mock clinical samples (infection-negative human sputum spiked 0-10<sup>5</sup> BCG cells/ml)  
34 underwent liquefaction in thermo-protection buffer and heat-inactivation. DNA was extracted  
35 and sequenced. Human DNA degraded faster than Mycobacteria DNA, resulting in target  
36 enrichment. Four replicate experiments each demonstrated detection at 10<sup>1</sup> BCG cells/ml,  
37 with 31-59 MTB complex reads. Maximal genome coverage (>97% at 5x-depth) was  
38 achieved at 10<sup>4</sup> BCG cells/ml; >91% coverage (1x depth) at 10<sup>3</sup> BCG cells/ml. Final  
39 validation employed MTB positive clinical samples (n=20), revealed initial sample volumes  
40 ≥1ml typically yielded higher mean depth of MTB genome coverage, the overall range 0.55-  
41 81.02. A mean depth of 3 gave >96% one-fold TB genome coverage (in 15/20 clinical  
42 samples). A mean depth of 15 achieved >99% five-fold genome coverage (in 9/20 clinical  
43 samples). In summary, direct-from-sample sequencing of MTB genomes was facilitated by a  
44 low cost thermo-protection buffer.

## 45 INTRODUCTION

46 *Mycobacterim tuberculosis* is the leading bacterial cause of death from infection, the World  
47 Health Organization (WHO) estimating that 10 million new tuberculosis (TB) cases and 1.2  
48 million deaths occurred worldwide in 2018 (World Health Organization Global Tuberculosis  
49 Report 2019; [https://www.who.int/tb/publications/global\\_report/en/](https://www.who.int/tb/publications/global_report/en/)). In addition, 5-10% of  
50 an estimated 1.7 billion people with latent TB infections are at risk of progressing to active  
51 disease. The greatest burden occurs in under-resourced regions of South-East Asia, Africa  
52 and the Western Pacific. There are large discrepancies between the estimated annual number  
53 of new cases (10 million) and the number reported (7 million) (WHO report  
54 [https://www.who.int/tb/publications/global\\_report/en/](https://www.who.int/tb/publications/global_report/en/)). Consequently, diagnostic methods for  
55 use at the point of care, to identify ‘missing’ cases are a global priority (1, 2). Rapid diagnosis  
56 and antimicrobial resistance determination are essential to ensure appropriate TB treatment  
57 and control, particularly in light of increasing drug resistance (3, 4). In 2018, approximately  
58 500,000 cases of rifampicin-resistant TB were identified, 78% of which were also isoniazid  
59 resistant (multi-drug resistant) ([https://www.who.int/tb/publications/global\\_report/en/](https://www.who.int/tb/publications/global_report/en/)).

60

61 The application of DNA sequencing to TB molecular diagnostics yields clinically valuable  
62 information. Its utility increases with the proportion of genome obtained; from detection, to  
63 speciation and antimicrobial resistance prediction, to phylogenetic and evolutionary insights.  
64 This allows whole genome sequencing (WGS) to out-perform other rapid molecular methods  
65 (such as GeneXpert MTB/RIF, Cepheid, Solna, Sweden) due to susceptibility predictions to  
66 multiple drugs, and its combination with classical epidemiological methods which informs  
67 transmission (5-8).

68

69 WGS of MTB from early positive cultures offers markedly faster results than traditional  
70 culture-based methods which take  $\leq 80$  days. The national implementation of Illumina  
71 sequencing of Mycobacteria from early positive cultures in England provides WGS in three  
72 to four weeks, together with antimicrobial resistance predictions (5, 9). Time to WGS could  
73 be reduced further if routine sequencing could be performed direct-from-sample.  
74 Furthermore, most DNA sequencing platforms (eg Illumina) have high capital costs, require  
75 reliable power supplies, cold chain reagent shipping and highly trained staff. In contrast, the  
76 Oxford Nanopore Technologies platform, (Oxford, UK), determines nucleotide sequences via  
77 a compact, portable device powered using a laptop USB port, which can be operated in varied  
78 and challenging locations (10-13). This offers a potential direct-from-sample sequencing  
79 platform for settings with the highest burden of TB – following the third pillar of the WHO  
80 End TB Strategy, ‘intensified research and innovation’ (1). However, multiple sample-  
81 preparation issues remain to be solved. Sample heat inactivation is a key health and safety  
82 requirement, but this causes DNA to degrade (14) and template of sufficient quantity and  
83 quality for nanopore sequencing is rarely recovered. Furthermore, the low proportion of  
84 Mycobacteria DNA in sputum, eg 0.01% (15) leads to poor genome coverage eg 0.002 - 0.7X  
85 by Illumina (16).  
86  
87 Methods published to date for direct from sputum sequencing of MTB are relatively complex  
88 and have not been widely adopted. MTB enrichment using SureSelect hybridisation and  
89 amplification (Agilent, USA) yielded 90% to complete genome assemblies, allowing  
90 antimicrobial susceptibility prediction (17, 18) and informing treatment for one patient in  
91 real-time (19). An alternative approach using kit-based depletion of non-target DNAs (16)  
92 obtained wide variation in genome coverage (<12% to >90%). Both approaches included heat  
93 inactivation, the former at 80°C for 50 min and the latter at 95°C for 30 min (15, 17). These

94 methods depend on commercial kits which inflate cost, shipping/storage requirements, and  
95 protocol complexity.

96

97 Our aim was to develop a simple, robust, low-cost method of preparing DNA of sufficient  
98 quality for nanopore sequencing, directly from positive sputum samples. Heat inactivation  
99 was essential, but culture and DNA amplification were excluded. The method was to be  
100 immediately transferable to two high burden settings for field testing - India and Madagascar.

## 101 **METHODS**

### 102 **Research Ethics Statement**

103 The protocol for this study was approved by London – Queen Square Research Ethics  
104 Committee (17/LO/1420). Human samples were collected under approval of East Midlands  
105 Research Ethics Committee (08/H0406/189) and all subjects gave written informed consent  
106 in accordance with the Declaration of Helsinki.

107

### 108 **Mock Clinical Samples for Method Development**

109 A model system comprising standardised mock clinical samples was established by pooling  
110 infection negative human sputum samples and spiking with enumerated *Mycobacterium bovis*  
111 (BCG) Pasteur strain at known concentrations.

#### 112 **(i) Culture and Enumeration of BCG Cells**

113 Culture conditions for BCG cells were optimised to yield mostly single cells which could be  
114 stained and counted, rather than rafts comprising large numbers of cells. Freshly prepared  
115 Bactec Mycobacteria growth indicator tube (MGIT) (Becton Dickinson, Wokingham, United  
116 Kingdom), UK) were inoculated very sparsely with 10 µl BCG Pasteur frozen stock. After 30  
117 days incubation at 37°C, the culture was vortexed vigorously. Larger clusters of BCG cells  
118 were allowed to settle for 10 min. Fresh MGIT tubes containing 0.5% Tween 80 (Acros  
119 Organics, Geel, Belgium), to encourage non-clustered cell growth (20), were inoculated using  
120 200 µl of the 'settled' BCG culture. The tubes were incubated for 18 days incubation at 37°C,  
121 then BCG cells were harvested and counted. After vigorous vortexing, 1 ml fluid was  
122 removed and BCG cells were pelleted by centrifugation for 10 min (13,000 rpm). The pellet  
123 was resuspended in 100 µl crystal violet stain (Pro Lab Diagnostics, Birkenhead, UK). Cells  
124 were counted using a Petroff Hausser counting chamber (Hausser Scientific, Horsham, PA,

125 USA) for bacteria enumeration. The enumerated BCG stock was stored at -20°C in 1 ml  
126 aliquots until required.

### 127 **(ii) Combining Enumerated BCG Cells and Infection Negative Sputum**

128 Negative human sputum samples were obtained anonymously from asthmatic patients (see  
129 research ethics statement). Up to ten samples were pooled, then liquefied by treatment with  
130 an equal volume of 2x strength thermo-protection buffer (4 M KCl, 0.05 M HEPES buffer pH  
131 7.5 (Sigma Aldrich, MO, USA), 0.1% DTT (Roche, UK), nuclease free molecular biology  
132 grade water) to ensure a final concentration of 2 M KCl. Fresh buffer was made weekly and  
133 stored in the dark at 4°C. Sputum was incubated at 37°C with occasional vortexing, until  
134 liquefaction was complete. The enumerated BCG cell stock was thawed, and a 10-fold  
135 dilution series was made in PBS, from 10<sup>5</sup> to 10<sup>1</sup> cells per 200 µl. The dilution series was  
136 spiked into 800 µl aliquots of the liquefied sputum in 2 ml screw cap tubes to make 1ml  
137 mock clinical samples. Microscopy was performed on these mock samples using ZN staining,  
138 and GeneXpert semi quantitative, cartridge based PCR (Cepheid, Solna, Sweden) for  
139 MTB/RIF Ultra according to the manufacturer's instructions.

140

### 141 **Validation of Mycobacteria Heat Inactivation**

142 A validation experiment was performed which confirmed that viable Mycobacteria did not  
143 survive heat inactivation at 99°C for 30 min in thermo-protection buffer (Table 1). This 'heat-  
144 kill' validation was performed prior to using the method on *Mycobacterium tuberculosis*  
145 positive clinical samples or MGIT cultures. Identical control samples prepared in parallel  
146 were incubated for 30 min at room temperature (Table 1). To assess Mycobacteria viability  
147 post-heating, each sample was added to a freshly prepared MGIT tube. These were checked  
148 regularly for Mycobacteria growth during incubation at 37°C for 8 weeks (or until positive).  
149 Löwenstein-Jensen slopes were also inoculated for the heat-treated samples.

150

## 151 **Clinical Samples**

152 Mycobacteria-positive clinical respiratory samples comprised sputum (n=16),  
153 bronchoalveolar lavage (BAL) (n=1) and lymph node biopsies (n=3) (the latter underwent  
154 ‘beating’ with large glass beads in saline solution for routine diagnostic testing prior to  
155 receipt). Samples were submitted for routine testing at Birmingham Heartlands Hospital NHS  
156 Foundation Trust, Birmingham, United Kingdom (n=6), or the Clinical Microbiology  
157 Laboratory, John Radcliffe Hospital, Oxford University NHS Foundation Trust, Oxford  
158 (n=14). Oxford samples had treatment with an equal volume of Sputasol (Oxoid Limited,  
159 Basingstoke, UK) prior to receipt, and were stored at 4°C. Samples from Birmingham  
160 comprised untreated sputum shipped overnight on ice to Oxford, after which they were stored  
161 at 4°C. Prior to receipt, Microscopy (with auramine staining), had yielded acid fast bacilli  
162 scores of +1 to +3 and, or a positive MTB/RIF Ultra GeneXpert result (Cepheid, Solna,  
163 Sweden). Samples were used only after routine diagnostic tests had been completed, therefore  
164 sample quality (available volume, storage time etc) varied. Samples were processed as soon  
165 as possible after receipt.

166

## 167 **Clinical Sample Liquefaction and Heat Inactivation**

168 All available clinical sample volume was used. Samples were liquefied using an equal  
169 volume of thermo-protection buffer containing DTT. 1 ml aliquots were heat-inactivated in 2  
170 ml screw cap tubes at 99°C for 30 min. Cells were collected by centrifugation (6,000 x g, 3  
171 min) and the supernatant discarded. Then cell pellets were combined (if >1 available per  
172 sample) in a total volume of 1 ml PBS. Cells were again collected by centrifugation (6,000 x  
173 g, 3 min) and resuspended in PBS followed by another centrifugation step. The two wash



174 steps aimed to reduce contamination with non-target DNA. The final cell pellet was  
175 resuspended in 100 µl PBS, then total DNA was extracted.

176

### 177 **Total DNA Extraction**

178 0.08-0.1 g silica beads (Lysing Matrix B, MP Biomedicals, CA, USA) were added to the heat  
179 inactivated cell suspension, which underwent two rounds of mechanical disruption using an  
180 MPBio Fast Prep-24 machine (MP Biomedicals, CA, USA) at 6.0 m/s for 40 s (5 min  
181 interval). After centrifugation at 16,000 x g for 10 min at room temperature, up to 100 µl of  
182 supernatant was transferred to a fresh tube (1.5 ml DNA LoBind, Eppendorf, Hamburg,  
183 Germany). DNA in the supernatant was purified using Agencourt AMPure XP beads  
184 (Beckman Coulter, CA, USA). An equal volume of beads was added to the supernatant and  
185 incubated on a hula mixer at room temperature for 10 min. Beads with DNA bound were  
186 magnetically separated and the supernatant was removed when clear. The beads were washed  
187 using 200 µl freshly prepared 70% ethanol which was removed after a 20 s incubation. This  
188 step was repeated once more, removing as much supernatant as possible at the end of the  
189 incubation and air drying for <1 min. DNA was eluted from the beads in 50 µl 1x TE buffer  
190 (pH 8, Sigma Aldrich, MO, USA) at 35°C for 10 min. DNA concentration was measured by  
191 Qubit Fluorometer (Invitrogen, CA, USA) and the DNA Integrity Number (DIN) and  
192 fragment size by TapeStation (Agilent, CA, USA).

193

### 194 **ONT Library Preparation and Sequencing**

195 Undigested DNA (up to 90 ng) was prepared for ONT sequencing using the Ligation  
196 Sequencing kit (SQK-LSK109). When samples were run multiplexed (more than one per  
197 flow cell), the Native Barcoding Expansion kit (EXP-NBD104) was used. The  
198 manufacturer's protocols 'Genomic DNA by Ligation' and 'Native barcoding genomic DNA'

199 were followed with minor amendments; 0.8 x volume of AMPure XP beads were used to  
200 purify the end-prep and barcode ligation reactions, incubation time with AMPure XP beads  
201 was doubled, and elution was performed at 35°C. Multiplexed sequencing libraries comprised  
202 6 barcoded DNA samples and all libraries were sequenced using R9.4.1 SpotON flow cells  
203 on GridIONs with the MinKNOW and Guppy software versions current at the time of  
204 sequencing.

205

## 206 **Bioinformatics**

207 Nanopore reads were basecalled using Guppy (Oxford Nanopore Technology, Oxford, UK).  
208 When one sample was sequenced per flow cell (without multiplexing), all the reads in the  
209 sequence data were analysed. For multiplexed runs with more than one sample per flow cell,  
210 we used Porechop (v0.2.2, <https://github.com/rrwick/Porechop>) to perform stringent barcode  
211 demultiplexing to minimize the number of misclassified reads. Porechop searches for the  
212 presence of the barcode sequence at both the start and end of each read; reads were classified  
213 only if the same barcode was found at both ends, otherwise the read was discarded. This level  
214 of stringency was achieved by setting the “require\_two\_barcodes” option in Porechop and  
215 setting the threshold for the barcode score at 60. (Porechop was used because much of the  
216 sequencing was performed prior to the availability of deepbinner or guppy\_barcode).

217 To allow the correct identification of *Mycobacterium tuberculosis* complex (MTB complex)  
218 reads from the sequencing data, we used both taxonomical classification and mapping  
219 approaches. Firstly, reads from each sample were taxonomically classified against the refSeq  
220 database using Centrifuge v1.0.3 (21). A read was considered as candidate for MTB complex  
221 if it was uniquely assigned to a species within MTB complex or equally assigned to more  
222 than one species within MTB complex. Human reads were discarded and not retained as part  
223 of our in house CRuMPIT workflow (22). Then, reads were mapped to either BCG (GenBank

224 AM408590.1; the 16S rRNA region {1498360, 1499896} was masked) or TB  
225 (NC\_000962.2; the 16S rRNA region {1471846, 1473382} was masked) reference sequences  
226 using Minimap2, (23) depending on the type of the sample. Reads were retained if more than  
227 85% of the bases were mapped (ie if the length of a read is 1,000 bp, >850 bp were required  
228 to be mapped to the reference sequence). Finally, MTB complex reads were identified as  
229 those agreed by Centrifuge and mapping. Integrative Genomics Viewer was used to view the  
230 mapping profiles (24). The mapping coverage and depth across the whole genome and 22  
231 genes associated with susceptibility/resistance to clinically important antimicrobials (25)  
232 were analysed using Samtools and Pysam (<https://github.com/pysam-developers/pysam>).

233 **RESULTS**

234 Our initial experiments focused on identifying a buffer in which Mycobacteria DNA was  
235 protected from degradation during heat-inactivation. Living organisms can survive at  
236 temperatures around the boiling point of water (26), indicating that DNA can exist intact at  
237 high temperatures. The high concentrations of KCl and MgCl<sub>2</sub> found in some  
238 hyperthermophiles are thought to help protect their DNA against thermo-degradation. This  
239 has been reproduced *in vitro* using plasmid DNA (26, 27) and formed the basis of buffer  
240 optimisation experiments.

241

242 **Optimisation of DNA thermo-protection buffer composition and heating duration**

243 Three different 118 ng DNA extracts were made: (i) BCG DNA, (ii) BCG and sputum DNA,  
244 (iii) sputum DNA. These were heated at 99°C for 30 min (Oxford Clinical Microbiology  
245 Laboratory health and safety requirement) in four different buffers; 25 mM HEPES pH 7.5  
246 plus 0, 0.5, 1 or 2 M KCl, then DNA (ng) remaining post-heating was recorded (Fig. 1A).  
247 The mass of DNA post-heating increased with increasing KCl (Fig. 1A). Furthermore, BCG  
248 DNA was better protected than sputum DNA; at 2 M KCl minimal BCG DNA degradation  
249 occurred, while >50% of sputum DNA degraded (Fig. 1A), indicating potential for BCG  
250 enrichment.

251 Next, we determined the impact of heating duration (0, 15, 30, 45, 60 min at 99°C) on the  
252 same three extracted DNAs, in 2M KCl thermo-protection buffer. The percentage decrease in  
253 amount of DNA remaining after heating was plotted relative to input DNA (Fig. 1B). DNA  
254 yield declined over time, but BCG DNA was again more heat stable than sputum DNA. The  
255 30 min time point was identified as ideal for both BCG enrichment and met health and safety  
256 requirements.

257

## 258 **Thermo-protection of DNA in intact BCG cells**

259 Next, we investigated whether DNA within intact Mycobacteria cells could be protected by  
260 thermo-protection buffer. BCG cells ( $10^5$  in total) were suspended in 1 ml thermo-protection  
261 buffer and incubated at 99°C for 0, 15, 30, 45 or 60 min. Control cells were heated for the  
262 same times in phosphate buffered saline (PBS). The experiment was performed in triplicate,  
263 then the DNA was extracted. The DNA yield from BCG cells heated in thermo-protection  
264 buffer was markedly higher than those heated in PBS (Fig. 2A) except at time 0 without  
265 heating. Here, the yield of DNA was lower than expected because the cell pellet was more  
266 diffuse when it had not been heated, and cells were more easily lost than in PBS.

267 In a separate experiment using intact Mycobacteria cells, 13 positive MGIT cultures  
268 (anonymised discards obtained from Oxford Clinical Microbiology Laboratory) were heated  
269 in 1ml thermo-protection buffer or in culture fluid. DNA yield was improved for the cells  
270 heated in thermo-protection buffer (Fig. 2B).

271

## 272 **Confirmation of Mycobacteria Heat Inactivation**

273 A validation experiment was performed to confirm that viable Mycobacteria (MTB H37Rv or  
274 BCG Pasteur) did not survive 30 min heating at 99°C in thermo-protection buffer. After 8  
275 weeks incubation at 37°C no growth occurred in the heated samples. In contrast, the room  
276 temperature controls remained viable (Table 1).

277

## 278 **Direct-from-Sample Sequencing of BCG-spiked Mock Clinical Samples**

279 Four sets of mock clinical samples were made, each set containing a ten-fold dilution series  
280 of enumerated BCG cells ( $10^5 - 10^1$  and zero cells) in 1 ml infection negative human sputum  
281 (liquefied in thermo-protection buffer). Four different batches of pooled sputum were used,  
282 but the BCG cells were from the same enumerated batch. All four replicates (experiments A-

283 D) underwent heat inactivation (99°C for 30 min), DNA extraction and ONT sequencing  
284 using a single flow cell per sample. Replicates in experiments B, C and D underwent  
285 additional microscopy (ZN staining) and GeneXpert PCR.  
286 Sequencing, Microscopy and GeneXpert PCR yielded reproducible data across the replicate  
287 experiments (Fig. 3, Table 2). The number of MTB complex sequencing reads generated per  
288 sample was linear and indicated detection down to  $10^1$  input BCG cells. At this concentration,  
289 31, 49, 51, and 59 MTB complex reads were detected (Fig. 3A). At  $10^3$  BCG cells input,  
290 genome coverage (1x) was >90% (Table 2). The ratio of human reads to MTB complex reads  
291 was also linear and reproducible (Fig. 3B).

292 Bioinformatics methods were optimised to ensure reads in negative controls (such as rRNA  
293 genes from non-target bacterial species (28)) were not incorrectly assigned as BCG; prior to  
294 these improvements close to 10,000 reads were incorrectly identified as MTB complex in the  
295 negative control (Fig. S1A). After the improvements, the negative controls for experiments  
296 A, C and D contained zero MTB complex reads, however three Mycobacteria reads were  
297 present in the negative control of experiment B (Fig. 3A, Figure S1A, Table 2).

298 GeneXpert (Cepheid) and microscopy results also followed the concentration of BCG cells  
299 spiked into each sample (Table 2). The detection limit of GeneXpert was  $10^1$  BCG cells and  
300 microscopy  $10^2$  where cells were described as very scanty, ie 1 or 2 per 100 fields (Table 2).

301

### 302 **Direct from Sample Sequencing using Multiplexing**

303 Sequencing more than one sample per flow cell (multiplexing), offers both time and cost  
304 efficiencies. To assess its feasibility, a short DNA ‘barcode’ was ligated to each DNA  
305 sample, then the 24 DNAs from replicate experiments A to D were sequenced at six samples  
306 per flow cell – one per replicate experiment. After sequencing, the barcodes were identified

307 bioinformatically and the data were assigned to their original sample. Unfortunately, the  $10^1$   
308 and  $10^2$  BCG spiked samples contained a similar number of MTB reads to the negative  
309 control (Fig. S1B), therefore using this approach the limit of detection declined 100 fold to  
310  $10^3$  BCG cells/ml sputum. This was a result of the barcodes of the BCG positive samples  
311 being incorrectly (and unavoidably) identified as that of the negative control (Fig. S1B). The  
312 multiplexing approach was also compromised by a reduction in the total data available for  
313 analysis. Although we applied stringent barcode demultiplexing criteria, between 5.28 and  
314 46.9% of total reads cannot be reliably assigned to an input sample.

315

### 316 **Thermo-protection method enriches mock clinical samples for MTB DNA**

317 The multiplexed data for the mock clinical samples in experiments A to D were used  
318 separately, to confirm whether the heat inactivation in thermo-protection buffer, enriched the  
319 samples for BCG sequences by depleting human DNA. This confirmed that heated samples  
320 were enriched for MTB DNA/depleted for human DNA (Fig. 4) when compared to  
321 equivalent controls prepared without heat inactivation and washing steps.

322

### 323 **Direct-from-Sample Sequencing of *M. tuberculosis* Positive Clinical Samples**

#### 324 **(i) DNA Preparation using thermo-protection method**

325 A total of 20 MTB positive clinical samples comprised 16 sputa, three lymph node biopsies,  
326 and one bronchoalveolar lavage sample. Samples were 1–14 days old, and volumes ranged  
327 from 0.25 – 1.5 ml. Microscopy and GeneXpert results indicated variable MTB loads (Table  
328 3). The total DNA extracted ranged from 105 – 3970 ng per sample, the DNA integrity  
329 number (DIN) from 1.8 – 6.3 and the peak fragment length 1,834 – 13,949 bp (Table 3). Each  
330 sample underwent direct-from-sample sequencing using a single R9.4.1 flow cell.

#### 331 **(ii) Sequence data**

332 The total number of reads obtained per flow cell ranged from 3,197,564 to 14,576,788 (Table  
333 3). Human reads were discarded prior to detailed analysis (ethics requirement). Among the  
334 non-human reads, mean MTB read length was up to 4.77 times longer than for non-MTB  
335 (Fig. 5A). MTB reads were detected in all twenty clinical samples (n=1,825-251,256) (Table  
336 3), the mean depth of genome coverage ranging from 0.55 to 81.02. An initial sample volume  
337  $\geq 1$ ml, and a lower percentage of human reads was apparently associated with higher depth of  
338 coverage, although the numbers were too small for statistical analysis (Table 3).

339

340 Plotting the mean depth of coverage against the percentage of MTB genome covered once, or  
341 five times revealed that  $\geq 96\%$  of the genome was covered once when a mean depth of  
342 approximately three was reached, and  $\geq 99\%$  was covered five times after a mean depth of  
343 fifteen (Fig. 5B, C). The depth of coverage across 22 key genes used to predict susceptibility  
344 to clinically important antimicrobials (25) closely followed the mean genome coverage  
345 (Table 3) (except one rRNA gene which was bioinformatically masked), indicating the  
346 absence of bias in depth of coverage across these regions of the genome, and confirming  
347 potential for antimicrobial resistance prediction.



348 **DISCUSSION**

349 The potential of the Nanopore platform for sequencing human and plant pathogens in varied  
350 and challenging locations is well established (10-13). It works on the principle of nanopore  
351 sequencing of DNA strands, with read lengths of several hundred to hundreds of thousands of  
352 bases obtained in real time (29, 30). The preparation of long, high quality input DNA is  
353 therefore essential. However, since DNA degrades rapidly at high temperatures (31) heat-  
354 inactivated MTB clinical samples typically yield poor quality material for sequencing. Here,  
355 we describe a simple, low cost method which overcomes this technical challenge. Sputum  
356 liquefaction and heat-inactivation were accomplished following addition of an equal volume  
357 of thermo-protection buffer (4M KCl, 0.05M HEPES buffer pH7.5, and 0.1% DTT) which  
358 inhibited DNA degradation during incubation at 99 °C. Samples were fortuitously enriched  
359 for Mycobacteria DNA under these conditions (Fig. 1, 2, 4). Buffer addition was the only  
360 handling step involving infectious material, minimising risk to staff in settings where  
361 containment laboratories are not available.

362

363 The composition of thermo-protection buffer was designed to emulate intracellular conditions  
364 of hyperthermophiles (26). At high temperatures it is thought that intracellular salts such as  
365 KCl and  $MgCl_2$  protect the DNA's N-glycosidic bonds against depurination and cleavage by  
366 hydrolysis of the adjacent phosphodiester bond (14, 41, 42). We chose  $K^+$  over  $Mg^{2+}$  because  
367 high  $K^+$  concentrations protect against cleavage at apurinic sites, while high  $Mg^{2+}$   
368 concentrations stimulate this (42). Furthermore, plasmid DNA appeared better protected in  
369 KCl (Fig. 1 in 42). The choice of KCl concentration (2 M) was informed by our own data  
370 (Fig. 1) and published data (26, 27). The mechanism whereby DNA in intact Mycobacteria  
371 cells was protected during heating in thermo-protection buffer (Fig. 2) is unclear, but  
372 suggests that the cell is, or becomes permeable to  $K^+$  during heating. Our data (Fig. 2B)

373 indicate that thermo-protection buffer can also improve the DNA yield obtainable from  
374 positive MGIT cultures, as currently used clinically by Public Health England for routine  
375 Illumina sequencing (43, 44). This may help to reduce numbers of samples which fail due to  
376 a low DNA yield.

377

378 The Oxford clinical microbiology laboratory chooses to inactivate Mycobacteria positive  
379 samples at 99°C for 30 min, because less stringent conditions (eg 20 min at 80°C) show  
380 variable efficacy (32-38). We confirmed that Mycobacteria heated in thermo-protection  
381 buffer at 99°C for 30 min were not viable (Table 1). Direct from sample sequencing results  
382 are optimal when input DNA is enriched for sequences of interest (16-18, 39). Depletion of  
383 up to 99.99% human DNA from non-TB lower respiratory tract samples has been achieved  
384 using saponin, osmotic shock, and ‘high salt’ nuclease treatments (40). However, no heat-  
385 inactivation was performed, and a specialist nuclease (Salt Active Nuclease, ArcticZymes,  
386 Tromsø, Norway) was required. Interestingly, we observed that during heating in thermo-  
387 protection buffer for 30 min at 99°C, non-target DNA degraded more rapidly than  
388 Mycobacteria DNA, providing fortuitous enrichment (Fig. 1, 2, 4). Consistent with this, mean  
389 read length obtained for MTB was longer than other non-human reads (Fig. 5A). We found  
390 that sufficient non-target DNA remained in our samples to provide a useful ‘carrier’. This  
391 was particularly important in low titre MTB samples; our 10<sup>1</sup> BCG limit of detection in mock  
392 clinical samples (Fig. 3A) would not have been achieved if the majority of human ‘carrier’  
393 DNA had been removed.

394

395 Three features of Mycobacteria DNA may have contributed to its enrichment relative to  
396 human DNA (Fig. 1, 4). Firstly, Mycobacteria DNA has a higher GC content (*M.*  
397 *tuberculosis* 65.6% GC, versus <50% GC for ~92% of human DNA (45, 46). Secondly, intact

398 MTB chromosomes are covalently closed circles - resistant to thermo-denaturation because  
399 the two single strands remain intertwined during heating (47). Finally, the MTB chromosome  
400 is negatively supercoiled (underwound – a feature potentially connected to its slow growth  
401 rate (48)), but less so than some bacterial species including *E.coli* (49). Lesser negative  
402 supercoiling reduces base exposure (50), which may reduce susceptibility to thermo-  
403 degradation, relative to human DNA. We did not assess the impact of heating on DNA from  
404 non-target microbes because the range and number of cells present was unpredictable and  
405 bioinformatics analysis cannot give a reliable taxonomic classification for approximately  
406 20% of the total reads in each sample.

407

408 We obtained optimal results when using a single R9.4.1 flow cell per sample (Fig. 3, Table  
409 3). This approach would be prohibitively expensive if used routinely, since a flow cell costs  
410 £380 - £720 depending on order size (1 to 300). Unfortunately, multiplexing six samples per  
411 flow cell did not provide a solution, since the inefficiency of barcode ligation and incorrect  
412 bar code identification post-sequencing reduced the limit of detection 100 fold (Fig. S1).

413 Run-time flexibility is also incompatible with multiplexing, due to variations in sample MTB  
414 titres. A solution may be to wash, re-generate and re-use flow cells after each use  
415 (<https://store.nanoporetech.com/flow-cell-wash-kit-r9.html>), or adopt single-use ONT  
416 Flongles at a cost of £72.50 each (at 30/01/2020). Unfortunately, the latter currently offer  
417 only 60-70 active sequencing pores in our hands, compared to 1200 – 1500 pores per R9.4.1  
418 flow cell.

419

420 The thermo-protection method was applied successfully to clinical samples (n=20). Higher  
421 mean depth of genome coverage appeared to reflect initial sample volume ( $\geq 1$  ml being  
422 ideal), and a lower human DNA content, but did not necessarily correlate with microscopy or

423 GeneXpert Ct values (Table 3). This may reflect the known variation in copy numbers of  
424 GeneXpert targeted insertion sequences (IS6110 and IS1081) between BCG (used in mock  
425 samples, where limit of detection, microscopy and GeneXpert data all correlated, Table 2)  
426 and MTB (51, 52). Also, microscopy was performed using auramine staining for clinical  
427 samples, ZN staining for mock clinical samples, and the former was performed by multiple  
428 different staff members.

429

430 The accuracy of DNA consensus sequences obtained using the Nanopore platform is 99.9%  
431 when Nanopolish is used (R.R. Wick, L.M. Judd, K.E. Holt. 2018. Comparison of Oxford  
432 Nanopore basecalling tools; <https://github.com/rrwick/Basecalling-comparison#references>),  
433 indicating potential for antimicrobial susceptibility prediction. Further work is required to  
434 examine this aspect in detail, particularly for ribosomal RNA genes which were masked to  
435 improve the accuracy of MTB detection, but are implicated in resistance (such as the 16s  
436 rRNS rrs gene; aminoglycoside resistance). A further potential advantage of direct from  
437 sample sequencing (using SureSelect and Illumina) is the detection of more genetic diversity  
438 than sequencing from culture (53). Increased numbers of target reads from low titre samples  
439 will require innovations such as Mycobacteria cell fractionation or concentration, followed by  
440 DNA amplification. The method could be enhanced by adapting to a cartridge-based system,  
441 further simplifying its application in resource poor settings.

442

443 In summary, a simple, low-cost method was developed to prepare MTB DNA for Nanopore  
444 sequencing direct from clinical samples. Neither commercial kits, nor time consuming culture  
445 were required, but the key health and safety requirement, heat-inactivation, was retained and  
446 exploited to achieve target sequence enrichment. Available data suggest the method can yield  
447 complete MTB genome sequences direct from clinical samples, without amplification,

448 achieving up to 81 fold mean depth of coverage. The protocol is currently undergoing testing  
449 by collaborators in India and Madagascar, with early data indicating reproducibility.

450 **REFERENCES**

- 451 1. Uplekar M, Weil D, Lonroth K, Jaramillo E, Lienhardt C, Dias HM, Falzon D, Floyd  
452 K, Gargioni G, Getahun H, Gilpin C, Glaziou P, Grzemska M, Mirzayev F, Nakatani H,  
453 Raviglione M; for WHO's Global TB Programme. 2015. WHO's new End TB Strategy.  
454 *Lancet* 385:1799-1801.
- 455 2. Sachdeva KS, Mase SR. 2019. The end TB strategy for India. *Indian J Tuberc.*  
456 66:165-166.
- 457 3. Tiberi S, Zumla A, Migliori GB. 2019. Multidrug and Extensively Drug-resistant  
458 Tuberculosis: Epidemiology, Clinical Features, Management and Treatment. *Infect Dis Clin*  
459 *North Am.* 33:1063-1085.
- 460 4. Dheda K, Gumbo T, Maartens G, Dooley KE, Murray M, Furin J, Nardell EA,  
461 Warren RM; Lancet Respiratory Medicine drug-resistant tuberculosis Commission group.  
462 2019. The Lancet Respiratory Medicine Commission: 2019 update: epidemiology,  
463 pathogenesis, transmission, diagnosis, and management of multidrug-resistant and incurable  
464 tuberculosis. *Lancet Respir Med.* 7:820-826.
- 465 5. Walker TM, Cruz ALG, Peto TE, Smith EG, Esmail H, Crook DW. 2017.  
466 Tuberculosis is changing. *Lancet Infect Dis.* 17:359-361.
- 467 6. CRyPTIC Consortium and the 100,000 Genomes Project, Allix-Béguet C,  
468 Arandjelovic I, Bi L, Beckert P, Bonnet M, Bradley P, Cabibbe AM, Cancino-Muñoz I,  
469 Caulfield MJ, Chaiprasert A, Cirillo DM, Clifton DA, Comas I, Crook DW, De Filippo MR,  
470 de Neeling H, Diel R, Drobniewski FA, Faksri K, Farhat MR, Fleming J, Fowler P, Fowler  
471 TA, Gao Q, Gardy J, Gascoyne-Binzi D, Gibertoni-Cruz AL, Gil-Brusola A, Golubchik T,  
472 Gonzalo X, Grandjean L, He G, Guthrie JL, Hoosdally S, Hunt M, Iqbal Z, Ismail N,  
473 Johnston J, Khanzada FM, Khor CC, Kohl TA, Kong C, Lipworth S, Liu Q, Maphalala G,  
474 Martinez E, Mathys V, Merker M, Miotto P, Mistry N, Moore DAJ, Murray M, Niemann S,

475 Omar SV, Ong RT, Peto TEA, Posey JE, Prammananan T, Pym A, Rodrigues C, Rodrigues  
476 M, Rodwell T, Rossolini GM, Sánchez Padilla E, Schito M, Shen X, Shendure J, Sintchenko  
477 V, Sloutsky A, Smith EG, Snyder M, Soetaert K, Starks AM, Supply P, Suriyapol P, Tahseen  
478 S, Tang P, Teo YY, Thuong TNT, Thwaites G, Tortoli E, van Soolingen D, Walker AS,  
479 Walker TM, Wilcox M, Wilson DJ, Wyllie D, Yang Y, Zhang H, Zhao Y, Zhu B. 2018.  
480 Prediction of Susceptibility to First-Line Tuberculosis Drugs by DNA Sequencing. *N Engl J*  
481 *Med.* 379:1403-1415.

482 7. Lalor MK, Casali N, Walker TM, Anderson LF, Davidson JA, Ratna N, Mullarkey C,  
483 Gent M, Foster K, Brown T, Magee J, Barrett A, Crook DW, Drobniewski F, Thomas HL,  
484 Abubakar I. 2018. The use of whole-genome sequencing in cluster investigation of a  
485 multidrug-resistant tuberculosis outbreak. *Eur Respir J.* 51pii:1702313.

486 8. Walker TM, Lalor MK, Broda A, Ortega LS, Morgan M, Parker L, Churchill S,  
487 Bennett K, Golubchik T, Giess AP, Del Ojo Elias C, Jeffery KJ, Bowler ICJW, Laurenson IF,  
488 Barrett A, Drobniewski F, McCarthy ND, Anderson LF, Abubakar I, Thomas HL, Monk P,  
489 Smith EG, Walker AS, Crook DW, Peto TEA, Conlon CP. 2014. Assessment of  
490 *Mycobacterium tuberculosis* transmission in Oxfordshire, UK, 2007–12, with whole  
491 pathogen genome sequences: an observational study. *Lancet Respir Med.* 2:285-292.

492 9. Quan TP, Bawa Z, Foster D, Walker T, Del Ojo Elias C, Rathod P; MMM Informatics  
493 Group, Iqbal Z, Bradley P, Mowbray J, Walker AS, Crook DW, Wyllie DH, Peto TEA,  
494 Smith EG. 2018. Evaluation of Whole-Genome Sequencing for Mycobacterial Species  
495 Identification and Drug Susceptibility Testing in a Clinical Setting: a Large-Scale Prospective  
496 Assessment of Performance against Line Probe Assays and Phenotyping. *J Clin Microbiol.* 56  
497 pii:e01480-17.

498

- 499 10. Quick, J, Quinlan, AR, Loman, NL. 2014. A reference bacterial genome dataset  
500 generated on the MinION portable single-molecule nanopore sequencer. *GigaScience* 3:22.
- 501 11. Quick J, Loman NJ, Duraffour S, Simpson JT, Severi E, Cowley L, Bore JA,  
502 Koundouno R, Dudas G, Mikhail A, Ouédraogo N, Afrough B, Bah A, Baum JH, Becker-  
503 Ziaja B, Boettcher JP, Cabeza-Cabrerizo M, Camino-Sanchez A, Carter LL, Doerrbecker J,  
504 Enkirch T, Dorival IGG, Hetzelt N, Hinzmann J, Holm T, Kafetzopoulou LE, Koropogui M,  
505 Kosgey A, Kuisma E, Logue CH, Mazzarelli A, Meisel S, Mertens M, Michel J, Ngabo D,  
506 Nitzsche K, Pallash E, Patrono LV, Portmann J, Repits JG, Rickett NY, Sachse A, Singethan  
507 K, Vitoriano I, Yemanaberhan RL, Zekeng EG, Trina R, Bello A, Sall AA, Faye O, Faye O,  
508 Magassouba N, Williams CV, Amburgey V, Winona L, Davis E, Gerlach J, Washington F,  
509 Monteil V, Jourdain M, Bererd M, Camara A, Somlare H, Camara A, Gerard M, Bado G,  
510 Baillet B, Delaune D, Nebie KY, Diarra A, Savane Y, Pallawo RB, Gutierrez GJ, Milhano N,  
511 Roger I, Williams CJ, Yattara F, Lewandowski K, Taylor J, Rachwal P, Turner D, Pollakis G,  
512 Hiscox JA, Matthews DA, O'Shea MK, Johnston AM, Wilson D, Hutley E, Smit E, Di Caro  
513 A, Woelfel R, Stoecker K, Fleischmann E, Gabriel M, Weller SA, Koivogui L, Diallo B,  
514 Keita S, Rambaut A, Formenty P, Gunther S, Carroll MW. 2016. Real-time, portable genome  
515 sequencing for Ebola surveillance. *Nature* 530:228-232.
- 516 12. de Jesus JG, Giovanetti M, Rodrigues Faria N, Alcantara LCJ. 2019. Acute Vector-  
517 Borne Viral Infection: Zika and MinION Surveillance. *Microbiol Spectr.* 7(4).
- 518 13. Boykin LM, Sseruwagi P, Alicai T, Ateka E, Mohammed IU, Stanton JL, Kayuki C,  
519 Mark D, Fute T, Erasto J, Bachwenkizi H, Muga B, Mumo N, Mwangi J, Abidrabo P, Okao-  
520 Okuja G, Omuut G, Akol J, Apio HB, Osingada F, Kehoe MA, Eccles D, Savill A, Lamb S,  
521 Kinene T, Rawle CB, Muralidhar A, Mayall K, Tairo F, Ndunguru J. 2019. Tree Lab:  
522 Portable genomics for Early Detection of Plant Viruses and Pests in Sub-Saharan Africa.  
523 *Genes* 10(9) pii: E632.



- 524 14. Lindahl T. 1993. Instability and decay of the primary structure of DNA. *Nature*.  
525 362:709-715.
- 526 15. Votintseva AA, Bradley P, Pankhurst L, Del Ojo Elias C, Loose M, Nilgiriwala K,  
527 Chatterjee A, Smith EG, Sanderson N, Walker TM, Morgan MR, Wyllie DH, Walker  
528 AS3,10, Peto TEA, Crook DW, Iqbal Z. 2017. Same-day diagnostic and surveillance data for  
529 tuberculosis via whole-genome sequencing of direct respiratory samples. *J Clin Microbiol*.  
530 55:1285-1298.
- 531 16. Doughty EL, Sergeant MJ, Adetifa I, Antonio M, Pallen MJ. 2014. Culture  
532 independent detection and characterisation of *Mycobacterium tuberculosis* and *M. africanum*  
533 in sputum samples using shotgun metagenomics on a benchtop sequencer. *PeerJ* 2: e585.
- 534 17. Brown AC, Bryant JM, Einer-Jensen K, Holdstock J, Houniet DT, Chan JZ, Depledge  
535 DP, Nikolayevskyy V, Broda A, Stone MJ, Christiansen MT, Williams R, McAndrew MB,  
536 Tutill H, Brown J, Melzer M, Rosmarin C, McHugh TD, Shorten RJ, Drobniewski F, Speight  
537 G, Breuer J. 2015. Rapid whole-genome sequencing of *Mycobacterium tuberculosis* isolates  
538 directly from clinical samples. *J Clin Microbiol*. 53:2230-2237.
- 539 18. Doyle RM, Burgess C, Williams R, Gorton R, Booth H, Brown J, Bryant JM, Chan J,  
540 Creer D, Holdstock J, Kunst H, Lozewicz S, Platt G, Romero EY, Speight G, Tiberi S,  
541 Abubakar I, Lipman M, McHugh TD, Breuer J. 2018. Direct Whole-Genome Sequencing of  
542 Sputum Accurately Identifies Drug-Resistant *Mycobacterium tuberculosis* Faster than MGIT  
543 Culture Sequencing. *J Clin Microbiol*. 56(8). pii: e00666-18.
- 544 19. Nimmo C, Doyle R, Burgess C, Williams R, Gorton R, McHugh TD, Brown M,  
545 Morris-Jones S, Booth H, Breuer J. 2017. Rapid identification of a *Mycobacterium*  
546 *tuberculosis* full genetic drug resistance profile through whole genome sequencing directly  
547 from sputum. *Int J Infect Dis*. 62:44-46.

- 548 20. Caceres N, Vilaplana C, Prats C, Marzo E, Llopis I, Valls J, Lopez D, Cardona PJ.  
549 2013. Evolution and role of corded cell aggregation in *Mycobacterium tuberculosis* cultures.  
550 Tuberculosis 93:690-698.
- 551 21. Kim D, Song L, Breitwieser FP, Salzberg SL. 2016. Centrifuge: rapid and sensitive  
552 classification of metagenomic sequences. Genome Res. 26:1721–1729.
- 553 22. Sanderson ND, Street TL, Foster D, Swann J, Atkins BL, Brent AJ, McNally MA,  
554 Oakley S, Taylor A, Peto TEA, Crook DW, Eyre DW. 2018. Real-time analysis of nanopore-  
555 based metagenomic sequencing from infected orthopaedic devices. BMC Genomics 19:710.
- 556 23. Li H. 2018. Minimap2: pairwise alignment for nucleotide sequences. Bioinformatics  
557 34:3094–3100.
- 558 24. Robinson JT, Thorvaldsdóttir H, Winckler W, Guttman M, Lander ES, Getz G,  
559 Mesirov, JP. 2011. Integrative Genomics Viewer. Nature Biotechnology 29:24–26.
- 560 25. Walker TM, Kohl TA, Omar SV, Hedge J, Del Ojo Elias C, Bradley P, Iqbal Z,  
561 Feuerriegel S, Niehaus KE, Wilson DJ, Clifton DA, Kapatai G, Ip CLC, Bowden R,  
562 Drobniewski FA, Allix-Béguec C, Gaudin C, Parkhill J, Diel R, Supply P, Crook DW, Smith  
563 EG, Walker AS, Ismail N, Niemann S, Peto TEA; Modernizing Medical Microbiology  
564 (MMM) Informatics Group. 2015. Whole-genome sequencing for prediction of  
565 *Mycobacterium tuberculosis* drug susceptibility and resistance: a retrospective cohort study.  
566 Lancet Infect Dis. 15:1193-1202.
- 567 26. Marguet E, Forterre P. 1994. DNA stability at temperatures typical for  
568 hyperthermophiles. Nucleic Acids Res. 22:1681-1686.
- 569 27. Marguet E, Forterre P. 2001. Stability and manipulation of DNA at extreme  
570 temperatures. Methods Enzymol. 334:205-215.
- 571 28. Wyllie DH, Sanderson N, Myers R, Peto T, Robinson E, Crook DW, Smith EG,  
572 Walker AS. 2018. Control of Artifactual Variation in Reported Intersample Relatedness

- 573 during Clinical Use of a *Mycobacterium tuberculosis* Sequencing Pipeline. J Clin Microbiol.  
574 56 pii: e00104-18.
- 575 29. Deamer D, Akeson M, Branton D. 2016. Three decades of nanopore sequencing. Nat  
576 Biotechnol 34:518-524.
- 577 30. Jain M, Olsen HE, Paten B, Akeson M. 2016. The Oxford Nanopore MinION:  
578 delivery of nanopore sequencing to the genomics community. Genome Biol 17: 239.
- 579 31. Gustafson CE, Alm RA, Trust TJ. 1993. Effect of heat denaturation of target DNA on  
580 the PCR amplification. Gene 123:241-244.
- 581 32. van Embden JD, Cave MD, Crawford JT, Dale JW, Eisenach KD, Gicquel B,  
582 Hermans P, Martin C, McAdam R, Shinnick TM. 1993. Strain identification of  
583 *Mycobacterium tuberculosis* by DNA fingerprinting: recommendations for a standardized  
584 methodology. J Clin Microbiol. 31:406-409.
- 585 33. Doig C, Seagar AL, Watt B, Forbes KJ. 2002. The efficacy of the heat killing of  
586 *Mycobacterium tuberculosis*. J Clin Pathol. 55:778-779.
- 587 34. Zwadyk P Jr1, Down JA, Myers N, Dey MS. 1994. Rendering of mycobacteria safe  
588 for molecular diagnostic studies and development of a lysis method for strand displacement  
589 amplification and PCR. J Clin Micobiol. 32:2140-2146.
- 590 35. Bemer-Melchior P, Drugeon HB. 1999. Inactivation of *Mycobacterium tuberculosis*  
591 for DNA typing analysis. J Clin Microbiol. 37:2350-2351.
- 592 36. Somerville W, Thibert L, Schwartzman, K, Behr MA. 2005. Extraction of  
593 *Mycobacterium tuberculosis* DNA: a question of containment J Clin Microbiol. 43:2996-  
594 2997.
- 595 37. Warren R, de Kock M, Engelke E, Myburgh R, Gey van Pittius N, Victor T, van  
596 Helden P. 2006. Safe Mycobacterium tuberculosis DNA extraction method that does not  
597 compromise integrity. J Clin Microbiol. 44:254-256.

- 598 38. Billard-Pomares T, Bleibtreu A, Walewski V, Dziri S, Barbat A, Zahar JR, Cruaud P,  
599 Carbonnelle E. 2019. Proposition of a safe *Mycobacterium tuberculosis* complex denaturation  
600 method that does not compromise the integrity of DNA for whole-genome sequencing.  
601 Tuberculosis 117:62-64.
- 602 39. Pendleton KM, Erb-Downward JR, Bao Y, Branton WR, Falkowski NR, Newton  
603 DW, Huffnagle GB, Dickson RP. 2017. Rapid Pathogen Identification in Bacterial  
604 Pneumonia Using Real-Time Metagenomics. Am J Respir Crit Care Med. 196:1610-1612.
- 605 40. Charalampous T, Kay GL, Richardson H, Aydin A, Baldan R, Jeanes C, Rae D,  
606 Grundy S, Turner DJ, Wain J, Leggett RM, Livermore DM, O'Grady J. 2019. Nanopore  
607 metagenomics enables rapid clinical diagnosis of bacterial lower respiratory infection. Nat  
608 Biotechnol. 37:783-792.
- 609 41. Lindahl T., Nyberg, B. 1972. Rate of depurination of native deoxyribonucleic acid.  
610 Biochemistry. 11:3610-3618.
- 611 42. Marguet E and Forterre P. 1998. Protection of DNA by salts against  
612 thermodegradation at temperatures typical for hyperthermophiles. Extremophiles. 2:115-122.
- 613 43. Votintseva AA, Pankhurst LJ, Anson LW, Morgan MR, Gascoyne-Binzi D, Walker  
614 TM, Quan TP, Wyllie DH, Del Ojo Elias C, Wilcox M, Walker AS, Peto TE, Crook DW.  
615 2015. Mycobacterial DNA extraction for whole-genome sequencing from early positive  
616 liquid (MGIT) cultures. J Clin Microbiol. 53:1137-1143.
- 617 44. Pankhurst LJ, Del Ojo Elias C, Votintseva AA, Walker TM, Cole K, Davies J,  
618 Fermont JM, Gascoyne-Binzi DM, Kohl TA, Kong C, Lemaitre N, Niemann S, Paul J,  
619 Rogers TR11, Roycroft E, Smith EG, Supply P, Tang P, Wilcox MH, Wordsworth S, Wyllie  
620 D, Xu L, Crook DW; COMPASS-TB Study Group. 2016. Rapid, comprehensive, and  
621 affordable mycobacterial diagnosis with whole-genome sequencing: a prospective study.  
622 Lancet Respir Med. 4:49-58.

- 623 45. Cole ST, Brosch R, Parkhill J, Garnier T, Churcher C, Harris D, Gordon SV,  
624 Eiglmeier K, Gas S, Barry CE 3rd, Tekaia F, Badcock K, Basham D, Brown D,  
625 Chillingworth T, Connor R, Davies R, Devlin K, Feltwell T, Gentles S, Hamlin N, Holroyd  
626 S, Hornsby T, Jagels K, Krogh A, McLean J, Moule S, Murphy L, Oliver K, Osborne J, Quail  
627 MA, Rajandream MA, Rogers J, Rutter S, Seeger K, Skelton J, Squares R, Squares S, Sulston  
628 JE, Taylor K, Whitehead S, Barrell BG. 1988. Deciphering the biology of *Mycobacterium*  
629 *tuberculosis* from the complete genome sequence. *Nature* 393:537-544.
- 630 46. Venter JC, Adams MD, Myers EW, Li PW, Mural RJ, Sutton GG, Smith HO, Yandell  
631 M, Evans CA, Holt RA, Gocayne JD, Amanatides P, Ballew RM, Huson DH, Wortman JR,  
632 Zhang Q, Kodira CD, Zheng XH, Chen L, Skupski M, Subramanian G, Thomas PD, Zhang J,  
633 Gabor Miklos GL, Nelson C, Broder S, Clark AG, Nadeau J, McKusick VA, Zinder N,  
634 Levine AJ, Roberts RJ, Simon M, Slayman C, Hunkapiller M, Bolanos R, Delcher A, Dew I,  
635 Fasulo D, Flanigan M, Florea L, Halpern A, Hannenhalli S, Kravitz S, Levy S, Mobarry C,  
636 Reinert K, Remington K, Abu-Threideh J, Beasley E, Biddick K, Bonazzi V, Brandon R,  
637 Cargill M, Chandramouliswaran I, Charlab R, Chaturvedi K, Deng Z, Di Francesco V, Dunn  
638 P, Eilbeck K, Evangelista C, Gabrielian AE, Gan W, Ge W, Gong F, Gu Z, Guan P, Heiman  
639 TJ, Higgins ME, Ji RR, Ke Z, Ketchum KA, Lai Z, Lei Y, Li Z, Li J, Liang Y, Lin X, Lu F,  
640 Merkulov GV, Milshina N, Moore HM, Naik AK, Narayan VA, Neelam B, Nusskern D,  
641 Rusch DB, Salzberg S, Shao W, Shue B, Sun J, Wang Z, Wang A, Wang X, Wang J, Wei M,  
642 Wides R, Xiao C, Yan C, Yao A, Ye J, Zhan M, Zhang W, Zhang H, Zhao Q, Zheng L,  
643 Zhong F, Zhong W, Zhu S, Zhao S, Gilbert D, Baumhueter S, Spier G, Carter C, Cravchik A,  
644 Woodage T, Ali F, An H, Awe A, Baldwin D, Baden H, Barnstead M, Barrow I, Beeson K,  
645 Busam D, Carver A, Center A, Cheng ML, Curry L, Danaher S, Davenport L, Desilets R,  
646 Dietz S, Dodson K, Doup L, Ferriera S, Garg N, Gluecksmann A, Hart B, Haynes J, Haynes  
647 C, Heiner C, Hladun S, Hostin D, Houck J, Howland T, Ibegwam C, Johnson J, Kalush F,

648 Kline L, Koduru S, Love A, Mann F, May D, McCawley S, McIntosh T, McMullen I, Moy  
649 M, Moy L, Murphy B, Nelson K, Pfannkoch C, Pratts E, Puri V, Qureshi H, Reardon M,  
650 Rodriguez R, Rogers YH, Romblad D, Ruhfel B, Scott R, Sitter C, Smallwood M, Stewart E,  
651 Strong R, Suh E, Thomas R, Tint NN, Tse S, Vech C, Wang G, Wetter J, Williams S,  
652 Williams M, Windsor S, Winn-Deen E, Wolfe K, Zaveri J, Zaveri K, Abril JF, Guigó R,  
653 Campbell MJ, Sjolander KV, Karlak B, Kejariwal A, Mi H, Lazareva B, Hatton T,  
654 Narechania A, Diemer K, Muruganujan A, Guo N, Sato S, Bafna V, Istrail S, Lippert R,  
655 Schwartz R, Walenz B, Yooseph S, Allen D, Basu A, Baxendale J, Blick L, Caminha M,  
656 Carnes-Stine J, Caulk P, Chiang YH, Coyne M, Dahlke C, Mays A, Dombroski M, Donnelly  
657 M, Ely D, Esparham S, Fosler C, Gire H, Glanowski S, Glasser K, Glodek A, Gorokhov M,  
658 Graham K, Gropman B, Harris M, Heil J, Henderson S, Hoover J, Jennings D, Jordan C,  
659 Jordan J, Kasha J, Kagan L, Kraft C, Levitsky A, Lewis M, Liu X, Lopez J, Ma D, Majoros  
660 W, McDaniel J, Murphy S, Newman M, Nguyen T, Nguyen N, Nodell M, Pan S, Peck J,  
661 Peterson M, Rowe W, Sanders R, Scott J, Simpson M, Smith T, Sprague A, Stockwell T,  
662 Turner R, Venter E, Wang M, Wen M, Wu D, Wu M, Xia A, Zandieh A, Zhu X. 2001. The  
663 sequence of the human genome. *Science* 291:1304-1351.

664 47. Vinograd J, Lebowitz J, Watson R. 1968. Early and late helix-coil transitions in  
665 closed circular DNA. The number of superhelical turns in polyoma DNA. *J Mol Biol.*  
666 33:173-197.

667 48. Higgins NP. 2014. RNA polymerase: chromosome domain boundary maker and  
668 regulator of supercoil density. *Curr Opin Microbiol.* 22:138-143.

669 49. Tretter EM, Berger JM. 2012. Mechanisms for defining supercoiling set point of  
670 DNA gyrase orthologs: II. The shape of the *gyrA* subunit C-terminal domain (CTD) is not a  
671 sole determinant for controlling supercoiling efficiency. *J Biol Chem.* 287:18645-18654.

- 672 50. Irobalieva RN, Fogg JM, Catanese DJ Jr, Sutthibutpong T, Chen M, Barker AK,  
673 Ludtke SJ, Harris SA, Schmid MF, Chiu W, Zechiedrich L. 2015. Structural diversity of  
674 supercoiled DNA. *Nat Commun.* 6:8440.
- 675 51. Gonzalo-Asensio J, Pérez I, Aguiló N, Uranga S, Picó A, Lampreave C, Cebollada A,  
676 Otal I, Samper S, Martín C. 2018. New insights into the transposition mechanisms of IS6110  
677 and its dynamic distribution between *Mycobacterium tuberculosis* Complex lineages. *PLoS*  
678 *Genet.* 14:e1007282.
- 679 52. van Soolingen D, Hermans PW, de Haas PE, van Embden JD. 1992. Insertion element  
680 IS1081-associated restriction fragment length polymorphisms in *Mycobacterium tuberculosis*  
681 complex species: a reliable tool for recognizing *Mycobacterium bovis* BCG. *J Clin Microbiol.*  
682 30:1772-1777.
- 683 53. Nimmo C, Shaw LP, Doyle R, Williams R, Brien K, Burgess C, Breuer J, Balloux F,  
684 Pym AS. 2019. Whole genome sequencing *Mycobacterium tuberculosis* directly from sputum  
685 identifies more genetic diversity than sequencing from culture. *BMC Genomics.* 20:389.

686 **FIGURE LEGENDS**

687 **Fig. 1**

688 **Optimisation of DNA thermo-protection buffer composition and duration of heat**

689 **inactivation at 99°C**

690 (A) Extracted DNA was heated in 25 mM HEPES buffer pH 7.5 containing 0, 0.5, 1 or 2 M

691 KCl. Input DNA comprised 118 ng of (i) BCG DNA, (ii) BCG and sputum DNA, (iii)

692 sputum DNA. Each DNA type was heated at 99°C, for 30 min.

693 (B) Impact of heating duration on DNA yield. DNA remaining post heating is expressed as a

694 percentage of the input DNA for (i)  $10^5$  BCG cells, (ii) 1ml sputum spiked with  $10^5$  BCG

695 cells, or (iii) 1ml sputum. BCG DNA degraded more slowly than sputum DNA, indicating the

696 potential for enrichment relative to human DNA at earlier time points.

697

698 **Fig. 2**

699 **Thermo-protection of DNA in intact BCG cells**

700 (A) Effect on DNA yield of heating intact enumerated 'de-clumped' BCG cells in thermo-

701 protection buffer for the times shown.  $10^5$  BCG cells were heated at 99°C for 0, 15, 30, 45 or

702 60 min in 2 M KCl and 25 mM HEPES pH 7.5 (thermo-protection buffer) or PBS (control).

703 The experiment was performed in triplicate and DNA was extracted post heating.

704 (B) DNA yield obtained when heating intact Mycobacteria cells from positive MGIT culture

705 in thermo-protection buffer versus heating in MGIT culture fluid. Data are shown for 13

706 positive MGIT cultures. The DNA yield obtained after heating for 30 min at 99°C in thermo-

707 protection buffer, compared to heating in MGIT fluid is plotted. Each dot indicates the total

708 DNA recovered (ng) from 1 ml initial MGIT culture. Numbers above the dots indicate the

709 fold improvement in DNA yield when thermo-protection buffer was used rather than MGIT



710 culture fluid. N/A indicates a sample where no DNA was recovered after heating in MGIT  
711 culture fluid, so no ‘fold improvement’ could be calculated.

712

713 **Fig. 3**

714 **Validation of DNA thermo-protection method using Mock Clinical Samples**

715 Mock clinical samples containing enumerated BCG cells ( $0 - 10^5$ ) in 1ml infection negative  
716 human sputum liquefied in thermo-protection buffer underwent heat-inactivation at 99°C for  
717 30 min. DNA was extracted and sequenced on a ONT MinION (1 R9.4.1 flow cell per  
718 sample). Reproducibility was assessed using four replicate experiments (A-D).

719 (A) Number of MTB complex reads generated per sample was linear and indicated a  
720 detection limit of  $10^1$  BCG cells.

721 (B) Ratio of human reads to MTB complex reads.

722

723 **Fig. 4**

724 **Mock clinical samples were enriched for Mycobacteria DNA after heating in thermo-**

725 **protection buffer.** Data are shown for four replicate experiments, A to D, in which samples  
726 were barcoded and run multiplexed six per flow cell. Each experiment comprised samples

727 made from a batch of infection negative sputum (liquefied using thermo-protection buffer  
728 containing DTT), 1 ml aliquots of which were spiked with enumerated BCG cells at  $10^5$  to

729  $10^1$  cells, and zero BCG cells (control). Sputum batch and therefore ‘background’ DNA did  
730 not vary within replicates A to D, only between them. The full set of replicates was set up

731 twice with heating (99°C, 30 min), and without heating. After sequencing, the numbers of  
732 BCG and human derived reads was assessed and their ratio in each sample calculated. Higher

733 ratios of human : MTB reads were obtained for samples which were not heated in thermo-

734 protection buffer, indicating heated samples were enriched for MTB reads relative to human

735 reads ie human DNA was depleted. The exception to this was experiment B, which yielded  
736 anomalous results because the number of reads for the unheated sample was unusually poor.

737

738 **Fig. 5**

739 **Sequence data generated direct from clinical samples - mean read lengths (MTB vs non**  
740 **MTB non-human sequences) and relationship between mean depth of coverage and**  
741 **complete genome coverage.**

742 (A) Comparison, for each of 20 clinical samples, of mean read length for MTB and non-MTB  
743 sequences (human sequences excluded prior to analysis). Clinical samples were ranked  
744 according to mean depth of coverage, indicated by numbers above the bars.

745 (B) Relationship between mean depth of coverage and percentage of the MTB genome  
746 covered once. A mean depth of coverage of three is required to achieve >96% one-fold TB  
747 genome coverage, achieved in 15/20 clinical samples.

748 (C) Relationship between mean depth of coverage and percentage of the MTB genome  
749 covered five times. A mean depth of coverage of 15 is required to achieve >99% five-fold  
750 genome coverage, achieved in 9/20 clinical samples.

751

752 **Fig. S1**

753 **Improvements to bioinformatic analysis of Nanopore sequence data generated direct-**  
754 **from-sample.**

755 (A) Analysis of results generated from mock clinical samples, each sequenced on a single  
756 flow cell. Samples comprised BCG spiked infection negative sputum containing  $10^5$  to  $10^1$   
757 and zero BCG cells. Data are shown before (blue dots) and after (red dots) mapping  
758 improvements. Prior to mapping improvements, close to 10,000 reads per sample were  
759 incorrectly identified as MTB complex. After the improvements, three contaminant reads

760 were detected in the negative control (zero BGC cells) of experiment B only. These were  
761 612, 788, and 1305 bases long and mapped independently and at high quality to the BCG  
762 reference genome, at positions 2798622-2799216, 282379-283169 and 2701067-2702371,  
763 the identity of these reads was further confirmed by BLASTn.

764 (B) Analysis of results generated from mock clinical samples, ‘barcoded’ and sequenced  
765 multiplexed six per flow cell. The results are shown before (blue dots) and after (red dots)  
766 mapping improvements. Even after mapping improvements, many reads persisted in the low  
767 BCG titre samples and negative controls. So, when running multiplexed samples, the limit of  
768 detection was compromised at  $10^3$ . The reason for this was the barcodes of DNA fragments  
769 belonging to BCG positive samples were incorrectly (and unavoidably) identified as the  
770 barcode of the negative control. The multiplexing approach was also compromised by a  
771 reduction in the total data available for analysis, since a relatively high proportion of the total  
772 reads were unbarcoded.

773

774 **Table 1. Heat Inactivation Validation**

| Sample type                                                                                                    | Mycobacteria cells* <sup>1</sup> | Heat treatment             | Time to positive MGIT culture |
|----------------------------------------------------------------------------------------------------------------|----------------------------------|----------------------------|-------------------------------|
| (i) 1 ml pooled negative human sputum liquefied with thermo-protection buffer containing DTT.                  | MTB H37Rv                        | Room temp 30 min (control) | 10 days                       |
|                                                                                                                | MTB H37Rv                        | 99°C 30 min                | Negative                      |
|                                                                                                                | BCG Pasteur                      | Room temp 30 min (control) | 18 days                       |
|                                                                                                                | BCG Pasteur                      | 99°C 30 min                | Negative                      |
| (ii) 1 ml sputasol treated sputum* <sup>2</sup> to which an equal volume of thermo-protection buffer was added | MTB H37Rv                        | Room temp 30 min (control) | 7 days                        |
|                                                                                                                | MTB H37Rv                        | 99°C 30 min                | Negative                      |
|                                                                                                                | BCG Pasteur                      | Room temp 30 min (control) | 8 days                        |
|                                                                                                                | BCG Pasteur                      | 99°C 30 min                | Negative                      |
| (iii) 0.5 ml positive MGIT culture plus equal volume thermo-protection buffer                                  | MTB H37Rv                        | Room temp 30 min (control) | 2 days                        |
|                                                                                                                | MTB H37Rv                        | 99°C 30 min* <sup>3</sup>  | Negative                      |
|                                                                                                                | BCG Pasteur                      | Room temp 30 min (control) | 3 days                        |
|                                                                                                                | BCG Pasteur                      | 99°C 30 min* <sup>3</sup>  | Negative                      |
|                                                                                                                |                                  |                            |                               |
| (iv) 1 ml positive MGIT culture spun down. Pellet resuspended in 1 ml thermo-protection buffer                 | MTB H37Rv                        | Room temp 30 min (control) | 4 days                        |
|                                                                                                                | MTB H37Rv                        | 99°C 30 min                | Negative                      |
|                                                                                                                | BCG Pasteur                      | Room temp 30 min (control) | 3 days                        |
|                                                                                                                | BCG Pasteur                      | 99°C 30 min                | Negative                      |

775

776 The final concentration of KCl used in each heat inactivation experiment (i) to (iv) was 2M.

777

778 \*<sup>1</sup>Spiking inoculum for sputum comprised live cultured BCG or *M. tuberculosis* H37Rv cells  
779 prepared by pelleting cells from 1 ml MGIT culture by centrifugation at 13,000 rpm for 10  
780 minutes, then resuspending in PBS (1 ml). One drop was used as the inoculum.

781

782 \*<sup>2</sup>Sputum samples received by the Clinical Microbiology Laboratory, John Radcliffe  
783 Hospital, Oxford, without a request for TB testing were decontaminated by treatment with  
784 4% NaOH (E and O Laboratories Ltd, Bonnybridge, Scotland), neutralised, spun down, and  
785 resuspended in 1ml sputasol. They were then spiked with 1 drop inoculum\*<sup>1</sup>.

786

787 \*<sup>3</sup>A precipitate formed on heating with thermo-protection buffer, possibly comprising  
788 salt/antibiotics/media components.

789

790 **Table 2. Reproducibility and detection limits of Microscopy, GeneXpert, and direct from sample ONT Sequencing.**

791 Input comprised mock clinical samples. These were pooled infection negative human sputum samples, liquefied using thermo-protection buffer  
 792 and spiked using enumerated BCG cells.

| <b>BCG cells</b>      | <b>Microscopy</b> | <b>GeneXpert</b> |                  | <b>Nanopore</b>              |                   |                              |                              |
|-----------------------|-------------------|------------------|------------------|------------------------------|-------------------|------------------------------|------------------------------|
| <b>Experiment B</b>   | <b>ZN Stain</b>   | <b>Ct value</b>  | <b>Detection</b> | <b>MTB complex Reads (n)</b> | <b>Mean Depth</b> | <b>Genome covered 1x (%)</b> | <b>Genome covered 5x (%)</b> |
| <b>10<sup>5</sup></b> | +++               | 16.4             | High             | 701,436                      | 261.99            | 98.73                        | 98.12                        |
| <b>10<sup>4</sup></b> | +++               | 16.5             | High             | 142,918                      | 55.0              | 98.30                        | 97.75                        |
| <b>10<sup>3</sup></b> | +                 | 17.1             | Medium           | 17,798                       | 7.17              | 97.86                        | 83.56                        |
| <b>10<sup>2</sup></b> | (+)               | 19.3             | Low              | 1,280                        | 0.56              | 44.26                        | 0.04                         |
| <b>10<sup>1</sup></b> | -                 | 23.0             | Very Low         | 51                           | 0.03              | 2.92                         | 0                            |
| <b>0</b>              | -                 | -                | Negative         | 3                            | 0                 | 0.06                         | 0                            |
| <b>Experiment C</b>   |                   |                  |                  |                              |                   |                              |                              |
| <b>10<sup>5</sup></b> | +++               | 16.2             | High             | 738,605                      | 225.73            | 98.48                        | 97.91                        |
| <b>10<sup>4</sup></b> | +++               | 16.3             | High             | 74,731                       | 20.19             | 97.76                        | 97.12                        |
| <b>10<sup>3</sup></b> | +                 | 17.1             | Medium           | 9,086                        | 2.75              | 91.84                        | 17.98                        |
| <b>10<sup>2</sup></b> | +                 | 17.6             | Medium           | 672                          | 0.21              | 19.11                        | 0                            |
| <b>10<sup>1</sup></b> | -                 | 22.7             | Low              | 31                           | 0.01              | 1.38                         | 0                            |
| <b>0</b>              | -                 | -                | Negative         | 0                            | 0                 | 0                            | 0                            |
| <b>Experiment D</b>   |                   |                  |                  |                              |                   |                              |                              |
| <b>10<sup>5</sup></b> | +++               | 16.2             | High             | 333,937                      | 99.92             | 98.15                        | 97.62                        |
| <b>10<sup>4</sup></b> | ++                | 16.4             | High             | 57,824                       | 16.28             | 97.66                        | 97.13                        |
| <b>10<sup>3</sup></b> | +                 | 17.0             | Medium           | 9,533                        | 3.37              | 93.97                        | 29.65                        |
| <b>10<sup>2</sup></b> | +                 | 18.9             | Low              | 494                          | 0.19              | 17.51                        | 0                            |
| <b>10<sup>1</sup></b> | -                 | 23.0             | Very Low         | 59                           | 0.02              | 2.29                         | 0                            |
| <b>0</b>              | -                 | -                | Negative         | 0                            | 0                 | 0                            | 0                            |

793

794

795 **Table 3. Direct ONT Sequencing of MTB Positive Clinical Samples**

| Sample Data |          |        | Parallel Laboratory Tests |            |           |           | Extracted DNA           |                      |  |
|-------------|----------|--------|---------------------------|------------|-----------|-----------|-------------------------|----------------------|--|
| ID          | Type     | Volume | Age                       | Microscopy | GeneXpert | Total DNA | Peak Fragment Length    | DNA Integrity Number |  |
|             |          | (ml)   | (days)                    |            | (Ct)      | (ng)      | (bp)                    | DIN                  |  |
| T15211      | O LN     | solid  | 3                         | +++        | 16.2      | 3590      | 1834                    | 3.3                  |  |
| 19.0609294  | B Sputum | 1      | 2                         | +          | 28.4      | 422       | 10760                   | 5.9                  |  |
| 19.0609025  | B Sputum | 1      | 8                         | NT         | 16.0      | 138       | 12266                   | 6.0                  |  |
| L34626      | O Sputum | 0.5    | 1                         | +++        | 15.9      | 912       | 8757                    | 6.2                  |  |
| L32975      | O BAL    | 1      | 14                        | +          | 16.2      | 241       | 9189                    | 6.1                  |  |
| 19.0608818  | B Sputum | 1      | 12                        | NT         | 16.2      | 126       | 13192                   | 6.1                  |  |
| L87135_1    | O Sputum | 1      | 14                        | +++        | 16.3      | 3187      | 7993                    | 4.0                  |  |
| 19.0608426  | B Sputum | 1      | 7                         | +++        | NT        | 3970      | 2403                    | 4.4                  |  |
| L87135      | O Sputum | 0.5    | 11                        | +++        | 16.3      | 926       | 6859                    | 3.6                  |  |
| L87133      | O Sputum | 1      | 14                        | +++        | NT        | 3686      | 7000                    | 4.4                  |  |
| 19.0609396  | B Sputum | 1.5    | 2                         | +          | 29.3      | 3206      | 6900                    | 5.6                  |  |
| L11276      | O Sputum | 0.25   | 1                         | +++        | 16.1      | 1735      | 8443                    | 5.7                  |  |
| L99052      | O LN     | solid  | 3                         | ++         | 16.4      | 105       | Could not be determined | 1.8                  |  |
| L99521      | O Sputum | 1      | 1                         | ++         | 16.0      | 3600      | 13949                   | 6.3                  |  |
| L37997      | O Sputum | 0.75   | 3                         | +          | 16.1      | 228       | 11879                   | 4.0                  |  |
| 19.0608494  | B Sputum | 0.5    | 6                         | NT         | 16.0      | 2610      | 1957                    | 3.5                  |  |
| L91635      | O Sputum | 0.5    | 2                         | +          | 17.2      | 2909      | 9044                    | 6.2                  |  |
| L96231      | O Sputum | 1      | 8                         | +          | NT        | 1133      | 8566                    | 4.6                  |  |
| L11990      | O Sputum | 0.25   | 13                        | +          | 18.5      | 270       | 6243                    | 5.7                  |  |
| W63114      | O LN     | solid  | 2                         | ++         | NT        | 265       | 1990                    | 4.7                  |  |

796

797 O: Microbiology Department, Oxford University Hospitals NHS Trust, Oxford, UK.

798 B: PHE National Mycobacteria Reference Service - North and Central, Birmingham Public Health Laboratory, UK

799 LN: Lymph node, solid piece of tissue, disrupted by bead beating in saline before receipt.

800 Microscopy: +++ large numbers of cells, strong positive, ++ moderate numbers, + scanty weakly positive.

801 Volume: equivalent volume of initial clinical sample received.

802 NT: Not tested.

803 **Table 3. Direct ONT Sequencing of MTB Positive Clinical Samples – Continued.**

| Sample Data |      |        | Sequence Data |             |       |                   |      |                        |         |                       |         |                       |         |
|-------------|------|--------|---------------|-------------|-------|-------------------|------|------------------------|---------|-----------------------|---------|-----------------------|---------|
| ID          | Type |        | Total Reads   | Human Reads |       | MTB Complex Reads |      | Mean Depth of Coverage |         | Genome covered 1x (%) |         | Genome covered 5x (%) |         |
|             |      |        | (n)           | (n)         | (%)   | (n)               | (%)  | Genome                 | R genes | Genome                | R genes | Genome                | R genes |
| T15211      | O    | LN     | 3755361       | 2806761     | 74.74 | 251256            | 6.69 | 81.02                  | 85.59   | 99.60                 | 100     | 99.53                 | 100     |
| 19.0609294  | B    | Sputum | 14576788      | 8472212     | 58.12 | 80357             | 0.55 | 45.01                  | 45.30   | 99.61                 | 100     | 99.49                 | 100     |
| 19.0609025  | B    | Sputum | 9108521       | 6675047     | 73.28 | 104748            | 1.15 | 36.40                  | 38.08   | 99.59                 | 100     | 99.51                 | 100     |
| L34626      | O    | Sputum | 3197564       | 2315352     | 72.41 | 56421             | 1.76 | 24.19                  | 24.37   | 99.58                 | 100     | 99.38                 | 100     |
| L32975      | O    | BAL    | 4119806       | 2497293     | 60.62 | 52536             | 1.28 | 23.02                  | 25.24   | 99.84                 | 100     | 99.75                 | 100     |
| 19.0608818  | B    | Sputum | 5979711       | 3730501     | 62.39 | 43148             | 0.72 | 22.30                  | 22.97   | 99.61                 | 100     | 99.28                 | 100     |
| L87135_1    | O    | Sputum | 7617356       | 5034871     | 66.10 | 38989             | 0.51 | 19.77                  | 14.94   | 99.60                 | 100     | 99.41                 | 100     |
| 19.0608426  | B    | Sputum | 6635435       | 6404796     | 96.52 | 74672             | 1.13 | 15.74                  | 16.62   | 99.40                 | 100     | 98.74                 | 100     |
| L87135      | O    | Sputum | 5637884       | 3569630     | 63.32 | 26216             | 0.46 | 14.58                  | 14.94   | 99.60                 | 100     | 99.10                 | 100     |
| L87133      | O    | Sputum | 7824904       | 6971470     | 89.09 | 12740             | 0.16 | 6.50                   | 6.78    | 99.38                 | 99.63   | 77.08                 | 75.35   |
| 19.0609396  | B    | Sputum | 6719776       | 6022913     | 89.63 | 14491             | 0.22 | 5.89                   | 6.23    | 99.05                 | 100     | 71.39                 | 77.42   |
| L11276      | O    | Sputum | 5514521       | 5397278     | 97.87 | 9505              | 0.17 | 4.75                   | 3.85    | 98.39                 | 99.48   | 53.37                 | 32.96   |
| L99052      | O    | LN     | 13507355      | 13268163    | 98.23 | 7124              | 0.05 | 3.36                   | 2.90    | 96.03                 | 92.19   | 27.27                 | 22.47   |
| L99521      | O    | Sputum | 7521636       | 7438072     | 98.89 | 4701              | 0.06 | 3.27                   | 3.69    | 95.81                 | 100     | 25.06                 | 23.82   |
| L37997      | O    | Sputum | 8014834       | 7714434     | 96.25 | 4650              | 0.06 | 2.89                   | 2.83    | 93.14                 | 95.02   | 19.39                 | 18.37   |
| 19.0608494  | B    | Sputum | 11811075      | 10915937    | 92.42 | 8091              | 0.07 | 2.06                   | 2.03    | 86.48                 | 83.73   | 7.24                  | 6.25    |
| L91635      | O    | Sputum | 4271540       | 4243731     | 99.35 | 1975              | 0.05 | 1.57                   | 1.76    | 78.83                 | 76.27   | 2.91                  | 2.35    |
| L96231      | O    | Sputum | 8829259       | 8572310     | 97.09 | 1545              | 0.02 | 1.14                   | 1.32    | 67.35                 | 61.46   | 1.24                  | 3.01    |
| L11990      | O    | Sputum | 4200973       | 145749      | 3.47  | 1898              | 0.05 | 0.86                   | 0.73    | 57.53                 | 48.04   | 0.34                  | 0       |
| W63114      | O    | LN     | 7408231       | 7351842     | 99.24 | 1825              | 0.02 | 0.55                   | 0.71    | 42.97                 | 48.74   | 0.05                  | 0       |

804

805 R genes: resistance genes – coverage across 22 genes associated with susceptibility/resistance to clinically important antimicrobials (25).

806

807 **FUNDING**

808 The study was funded by the NIHR Oxford Biomedical Research Centre. Computation used  
809 the Oxford Biomedical Research Computing (BMRC) facility, a joint development between  
810 the Wellcome Centre for Human Genetics and the Big Data Institute supported by Health  
811 Data Research UK and the NIHR Oxford Biomedical Research Centre. The views expressed  
812 in this publication are those of the authors and not necessarily those of the NHS, the National  
813 Institute for Health Research, the Department of Health or Public Health England.



Figure 1

A

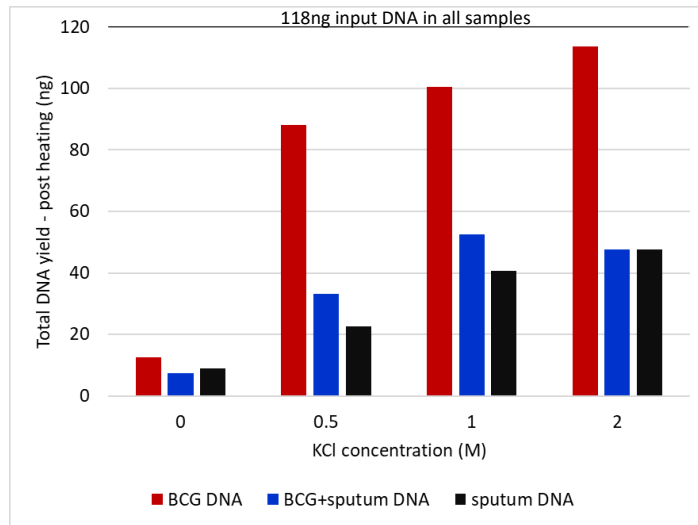

B

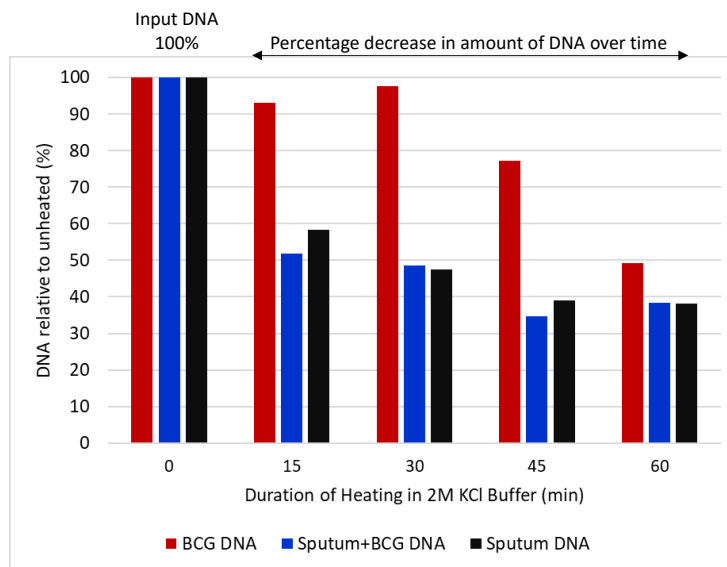

Figure 2

A

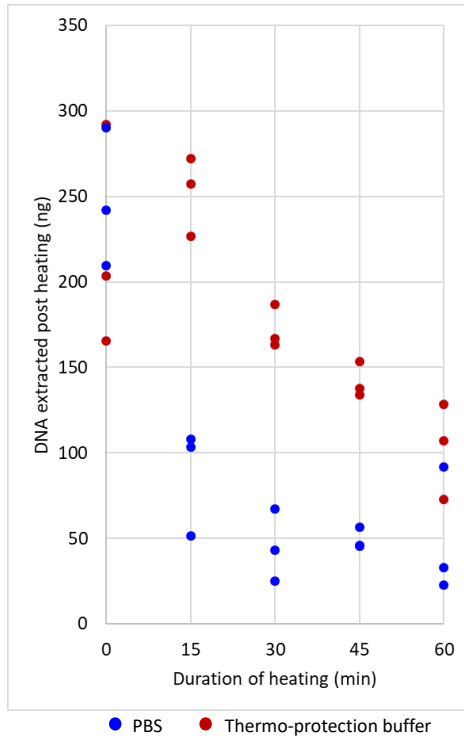

B

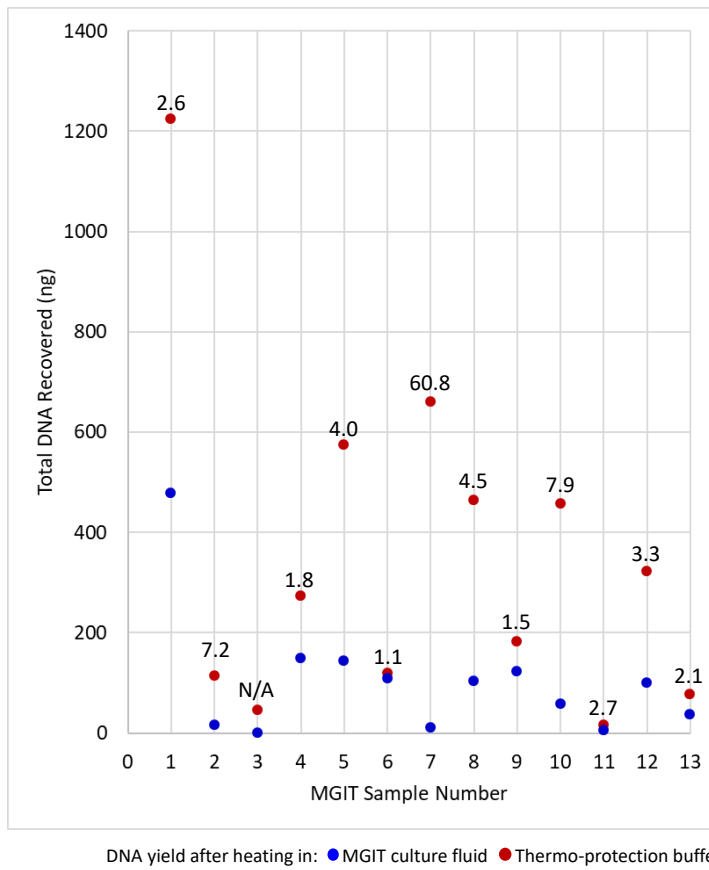

Figure 3

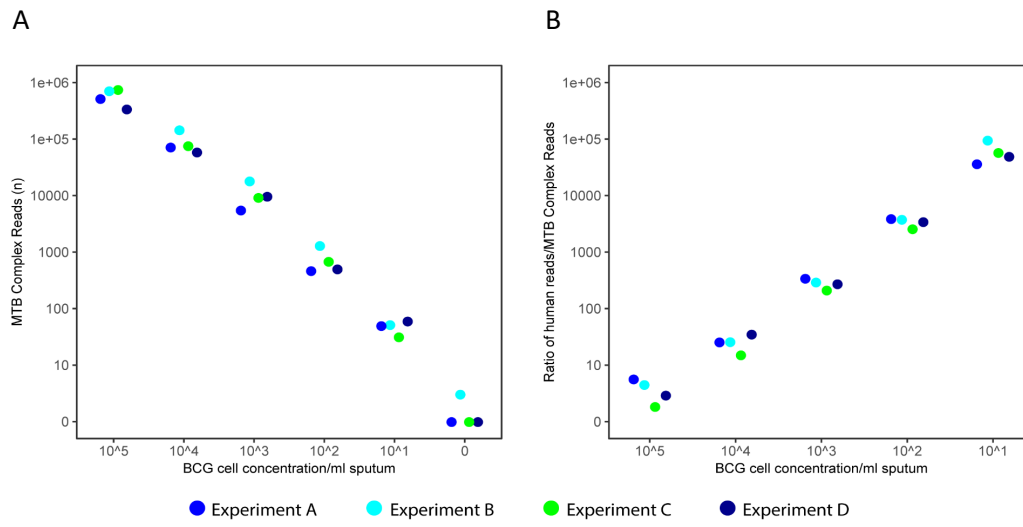

Figure 4

Ratio of Human Reads (n) : MTB Complex Reads (n) in Thermo-protection buffer treated and untreated samples

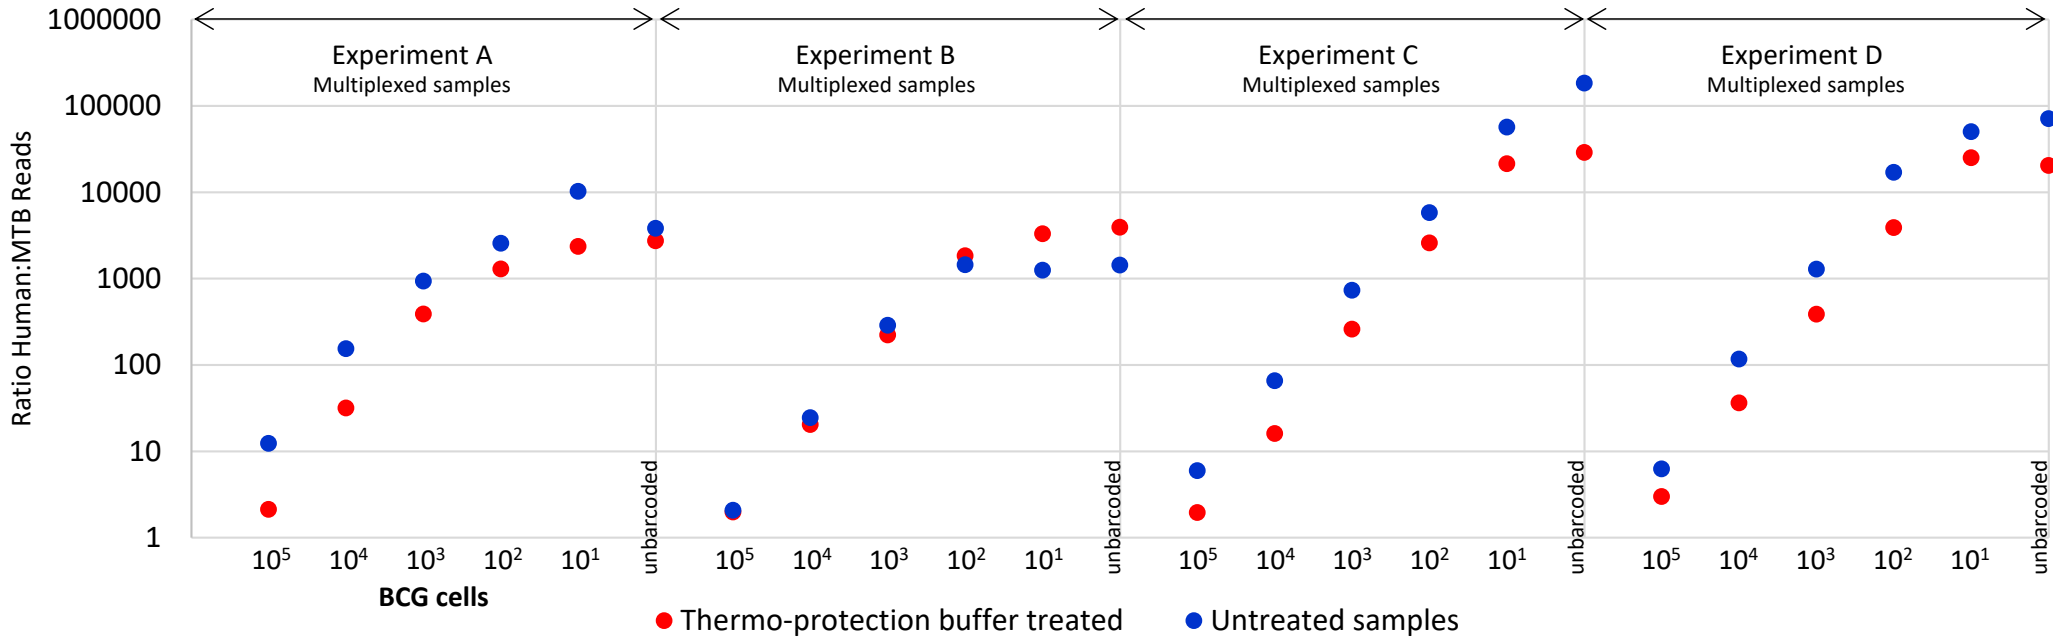

Figure 5

A

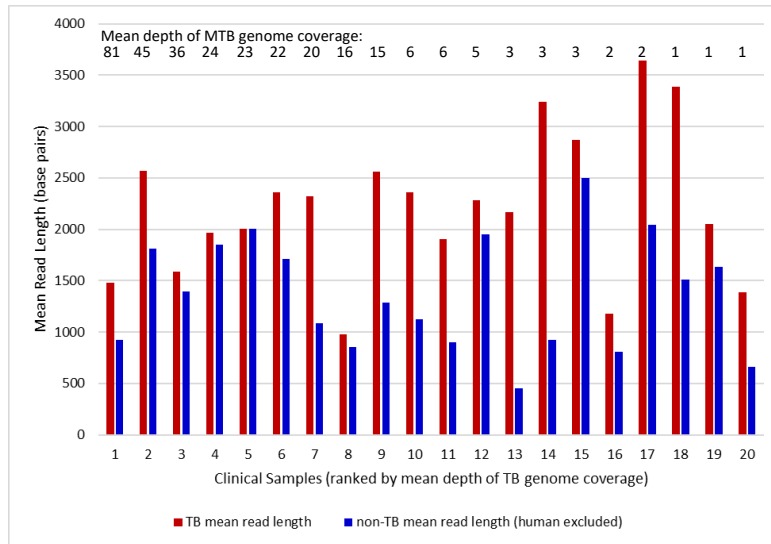

B

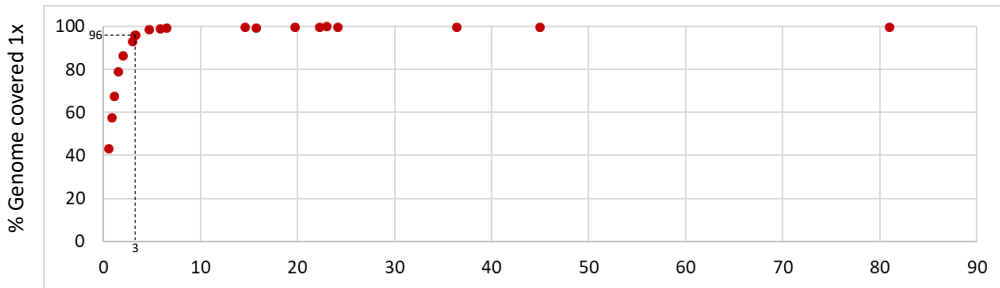

C

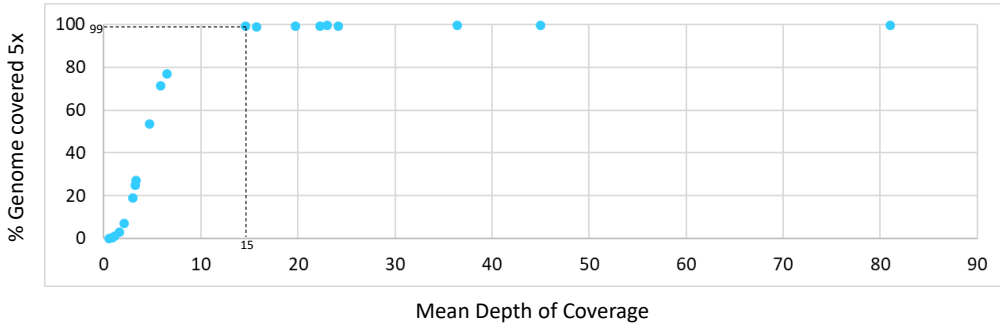

Fig. S1

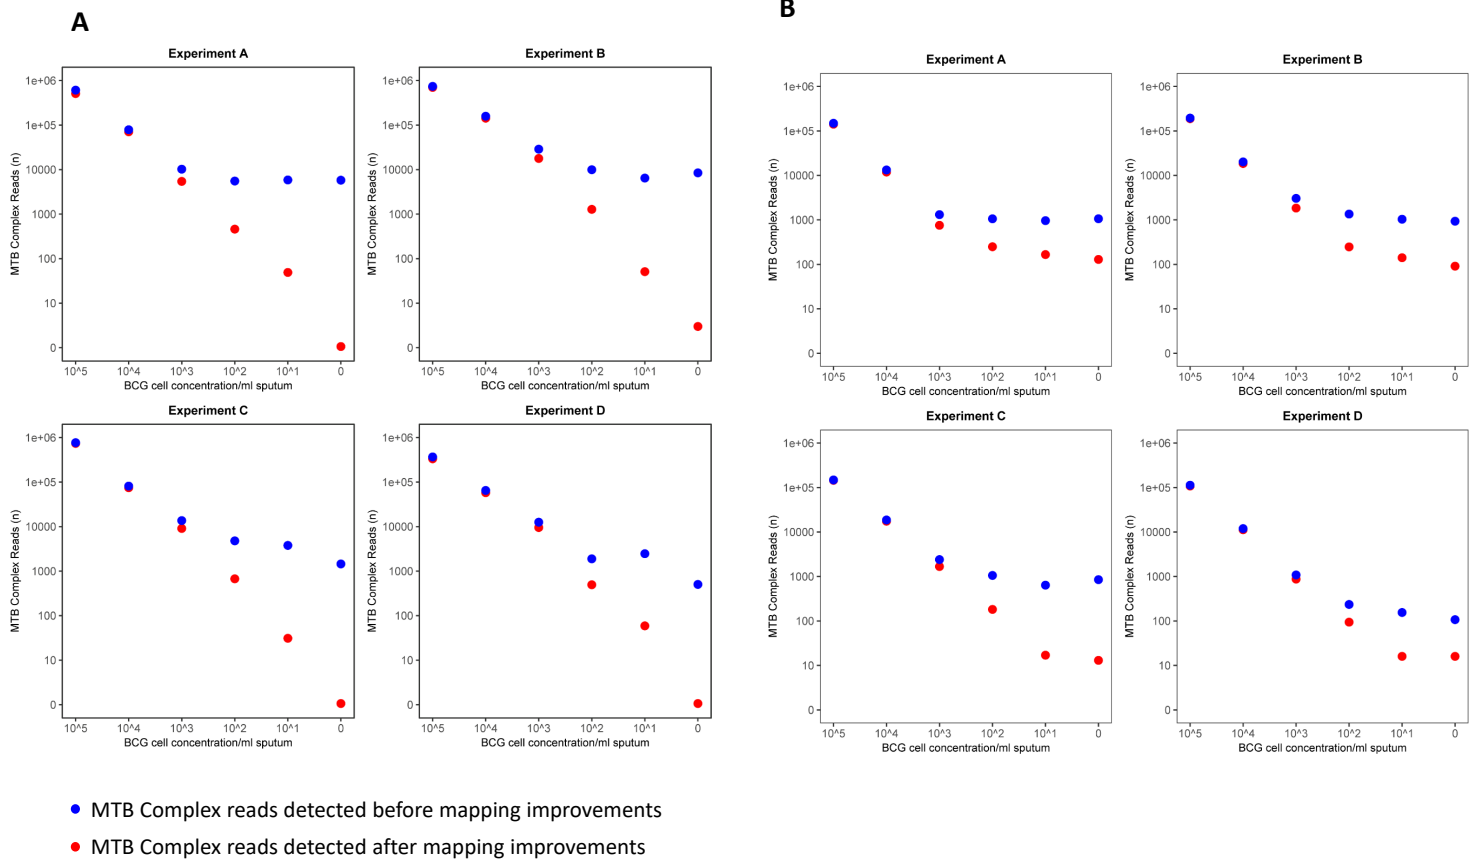

Source: https://www.biorxiv.org/content/10.1101/2020.04.05.026864v1.full.pdf
